# Supplementary material for: Adsorption of oral antibacterial agents on zirconia surfaces with different crystal systems
Source: Royal Society of Chemistry journal article supplement (doi:10.1039/d4ra04084h), 2024-01-01
Supplement: d4ra04084h1.pdf [file d4ra04084h1.pdf]

Supporting information: Adsorption of oral antibacterial agents on zirconia surfaces with different crystal systems

Mihiro Itotagawa, Hiroshi Kono, Tadahiro Higashinakao, Yuki Sugiura, Yuta Otsuka,  
Masafumi Kikuchi and Yoshihiro Nishitani

**FT-IR measurements**

The chemical bonding structure of the samples was determined via Fourier transform infrared (FT-IR) spectroscopy (FT/IR-4200, JASCO Co., Tokyo, Japan) using a triglycine sulfate detector (64 scans, 4 cm<sup>-1</sup> resolution) with a diamond attenuated total reflection prism. The measurements were obtained in an air atmosphere.

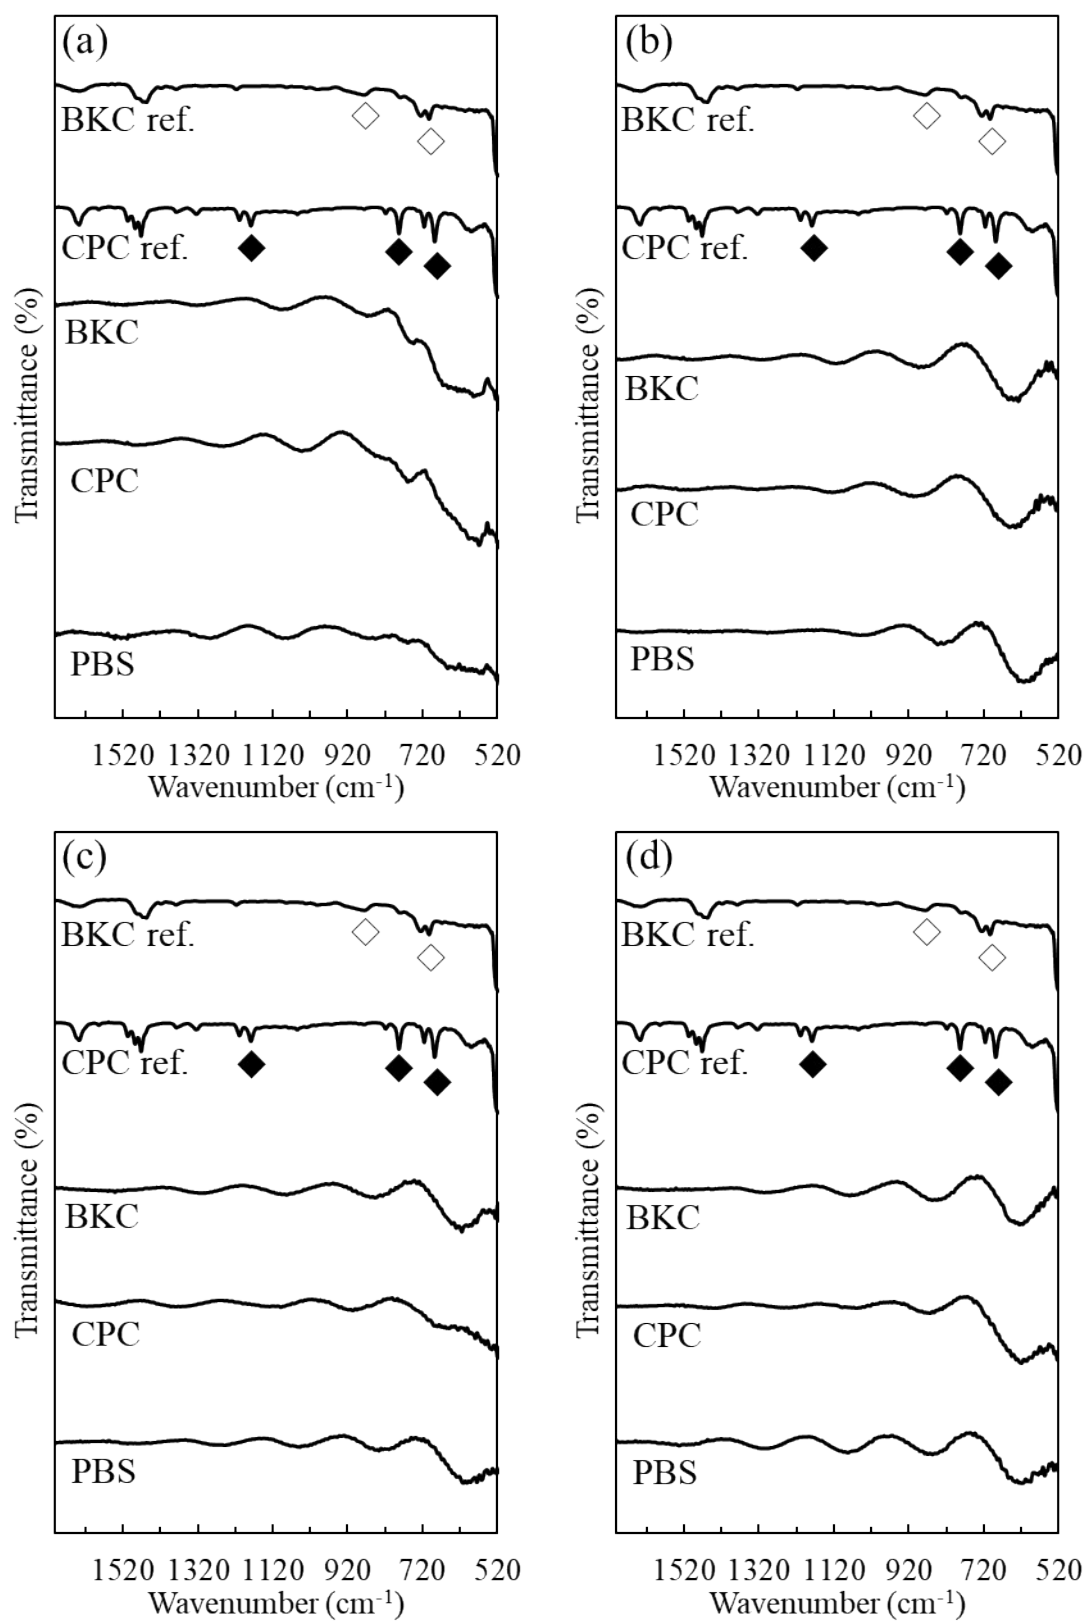

**Fig. S1** FT-IR spectra of the samples. (a) ZrO<sub>2</sub>, (b) 3Y-TZP, (c) 4Y-TZP, and (d) 6Y-TZP. The diamond symbols indicate the major peaks of the CPC and BKC references.
